# Supplementary material for: Effect of dielectric constant on estimation of properties of ionic liquids: an analysis of 1-alkyl-3-methylimidazolium bis(trifluoromethylsulfonyl)imide
Source: Royal Society of Chemistry journal article supplement (doi:10.1039/c5ra11425j), 2015-01-01
Supplement: c5ra11425j1.pdf [file c5ra11425j1.pdf]

## Electronic Supplementary Information (ESI) for

# Effect of dielectric constant on estimation of properties of ionic liquids: An analysis of 1-alkyl-3-methylimidazolium bis(trifluoromethylsulfonyl)imide<sup>†</sup>

Lourdes del Olmo,<sup>a</sup> Isabel Lage-Estebanez,<sup>a</sup> Rafael López,<sup>a</sup> and José M. García de la Vega<sup>\*a</sup>

**Table S 1** Interaction energy (kJ.mol<sup>-1</sup>) of C<sub>1</sub>mimNTf<sub>2</sub> and C<sub>4</sub>mimNTf<sub>2</sub>, and cation-anion distance (Å) for these ILs as CA model for different dielectric constants

| $\epsilon$ | C <sub>1</sub> mimNTf <sub>2</sub> |                     | C <sub>4</sub> mimNTf <sub>2</sub> |                     |
|------------|------------------------------------|---------------------|------------------------------------|---------------------|
|            | $\Delta E_{int}$                   | $d_{H(C^+)-N(A^-)}$ | $\Delta E_{int}$                   | $d_{H(C^+)-N(A^-)}$ |
| 1          | -315.6                             | 2.07                | -308.5                             | 2.10                |
| 2          | -131.0                             | 2.26                | -131.2                             | 2.17                |
| 10         | -26.0                              | 2.46                | -25.1                              | 2.50                |
| 33         | -6.2                               | 2.54                | -6.7                               | 2.61                |
| 78         | -1.5                               | 2.57                | -0.8                               | 2.69                |

**Table S 2** Interaction energy (kJ.mol<sup>-1</sup>) of C<sub>1-12</sub>mimNTf<sub>2</sub> and cation-anion distance (Å) for these ILs as CA model

| Ionic liquid                        | $\Delta E_{int}$ |                 | $d_{H(C^+)-N(A^-)}$ |                 |
|-------------------------------------|------------------|-----------------|---------------------|-----------------|
|                                     | $\epsilon = 1$   | $\epsilon = 78$ | $\epsilon = 1$      | $\epsilon = 78$ |
| C <sub>1</sub> mimNTf <sub>2</sub>  | -315.6           | -1.5            | 2.07                | 2.57            |
| C <sub>2</sub> mimNTf <sub>2</sub>  | -314.6           | -1.8            | 2.09                | 2.44            |
| C <sub>3</sub> mimNTf <sub>2</sub>  | -310.0           | -1.0            | 2.10                | 2.59            |
| C <sub>4</sub> mimNTf <sub>2</sub>  | -308.5           | -0.8            | 2.10                | 2.69            |
| C <sub>5</sub> mimNTf <sub>2</sub>  | -308.0           | -1.0            | 2.10                | 2.58            |
| C <sub>6</sub> mimNTf <sub>2</sub>  | -307.1           | -0.4            | 2.10                | 2.64            |
| C <sub>7</sub> mimNTf <sub>2</sub>  | -307.1           | -0.6            | 2.10                | 2.78            |
| C <sub>8</sub> mimNTf <sub>2</sub>  | -306.6           | -0.8            | 2.10                | 2.71            |
| C <sub>9</sub> mimNTf <sub>2</sub>  | -306.3           | -0.5            | 2.10                | 2.73            |
| C <sub>10</sub> mimNTf <sub>2</sub> | -306.3           | -0.4            | 2.10                | 2.65            |
| C <sub>11</sub> mimNTf <sub>2</sub> | -306.5           | -0.9            | 2.11                | 2.58            |
| C <sub>12</sub> mimNTf <sub>2</sub> | -306.6           | -1.0            | 2.11                | 2.58            |

<sup>0a</sup> Departamento de Química Física Aplicada, Facultad de Ciencias, Universidad Autónoma de Madrid, 28049 Madrid, Spain. E-mail: garcia.delavega@uam.es

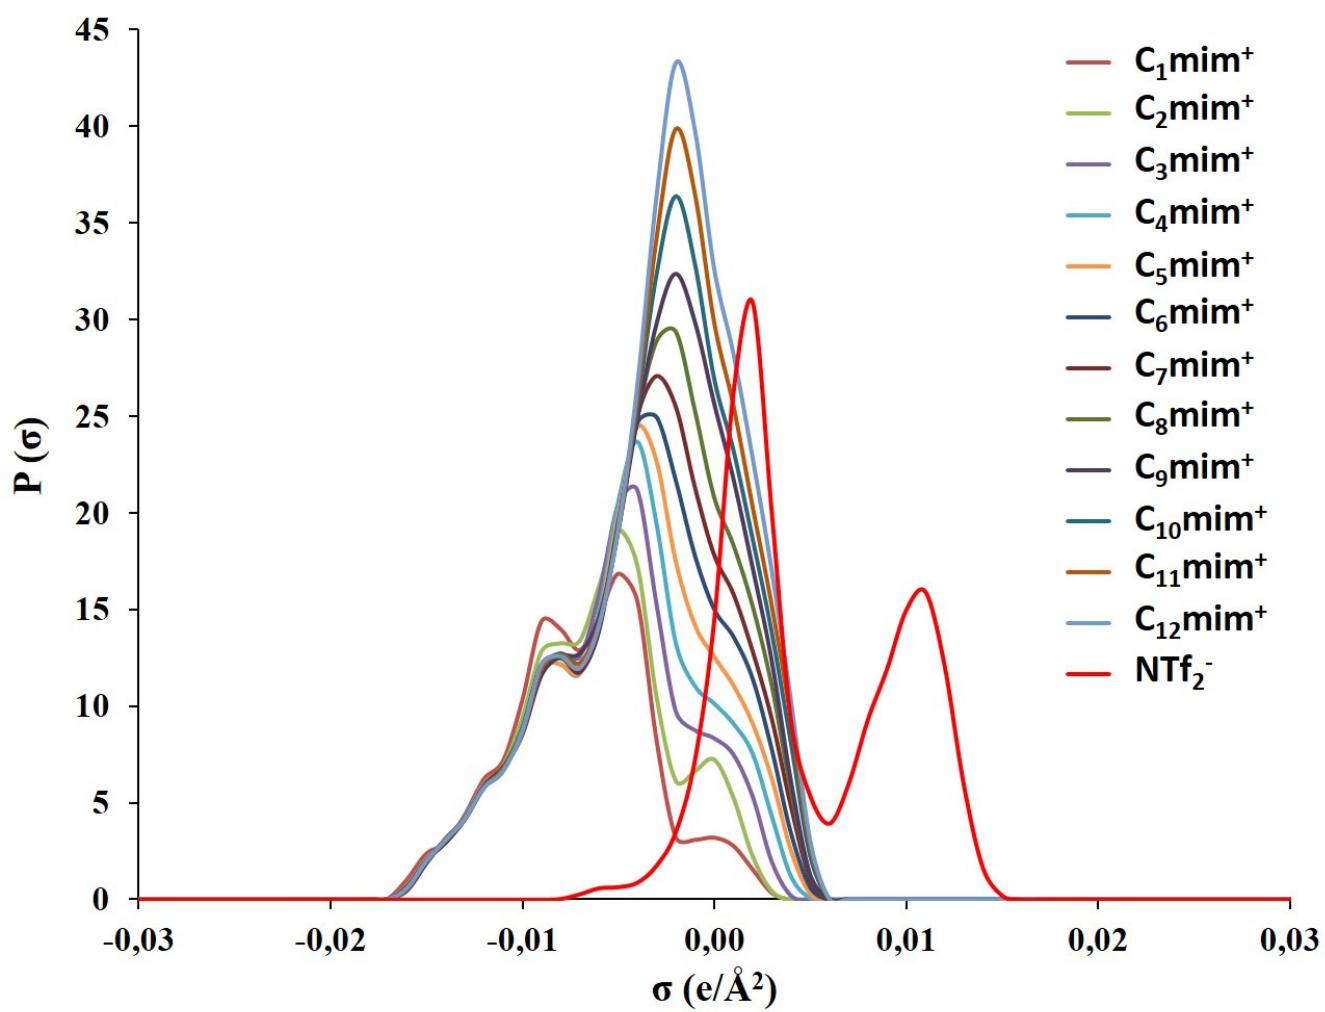

**Figure S 1**  $\sigma$ -profiles of  $C_{1-12}\text{mimNTf}_2$  represented as C+A model with  $\varepsilon = 1$

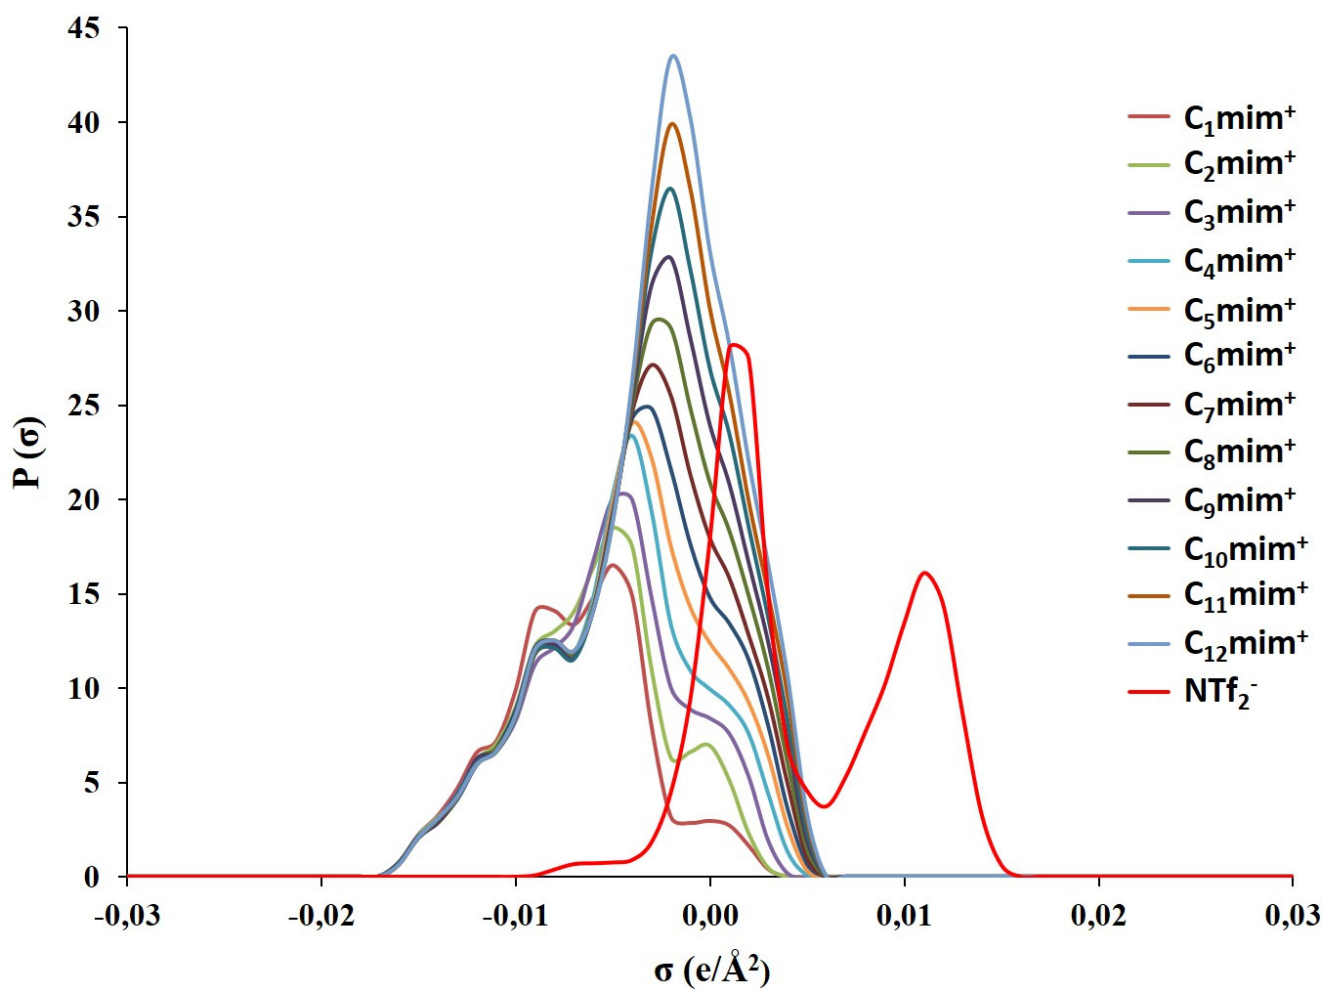

**Figure S 2**  $\sigma$ -profiles of  $\text{C}_{1-12}\text{mimNTf}_2$  represented as C+A model with  $\epsilon = 78$

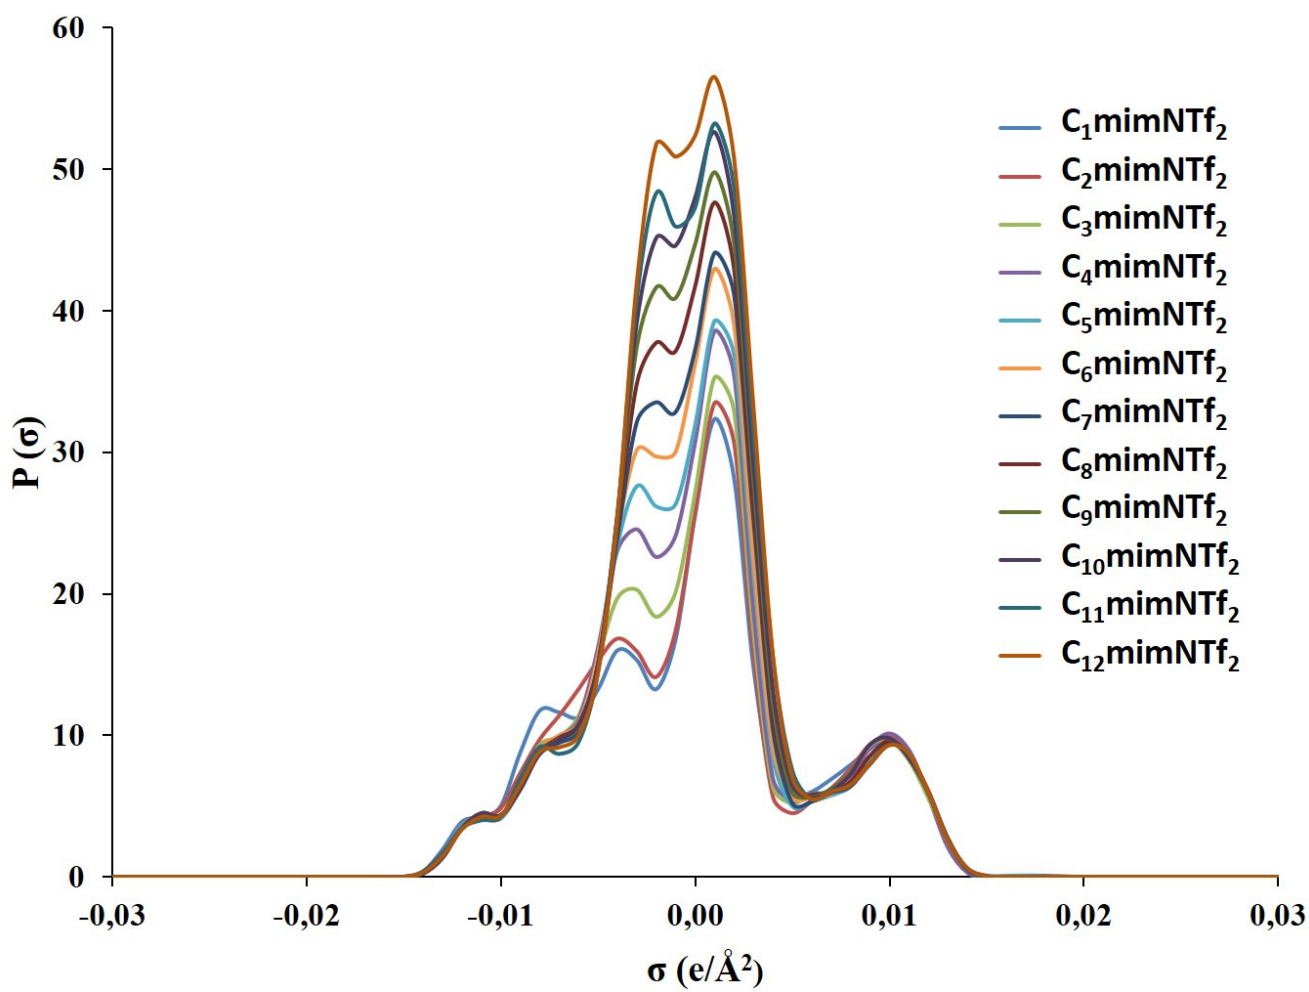

**Figure S 3**  $\sigma$ -profiles of  $C_{1-12}$ mimNTf<sub>2</sub> represented as CA model with  $\epsilon = 1$

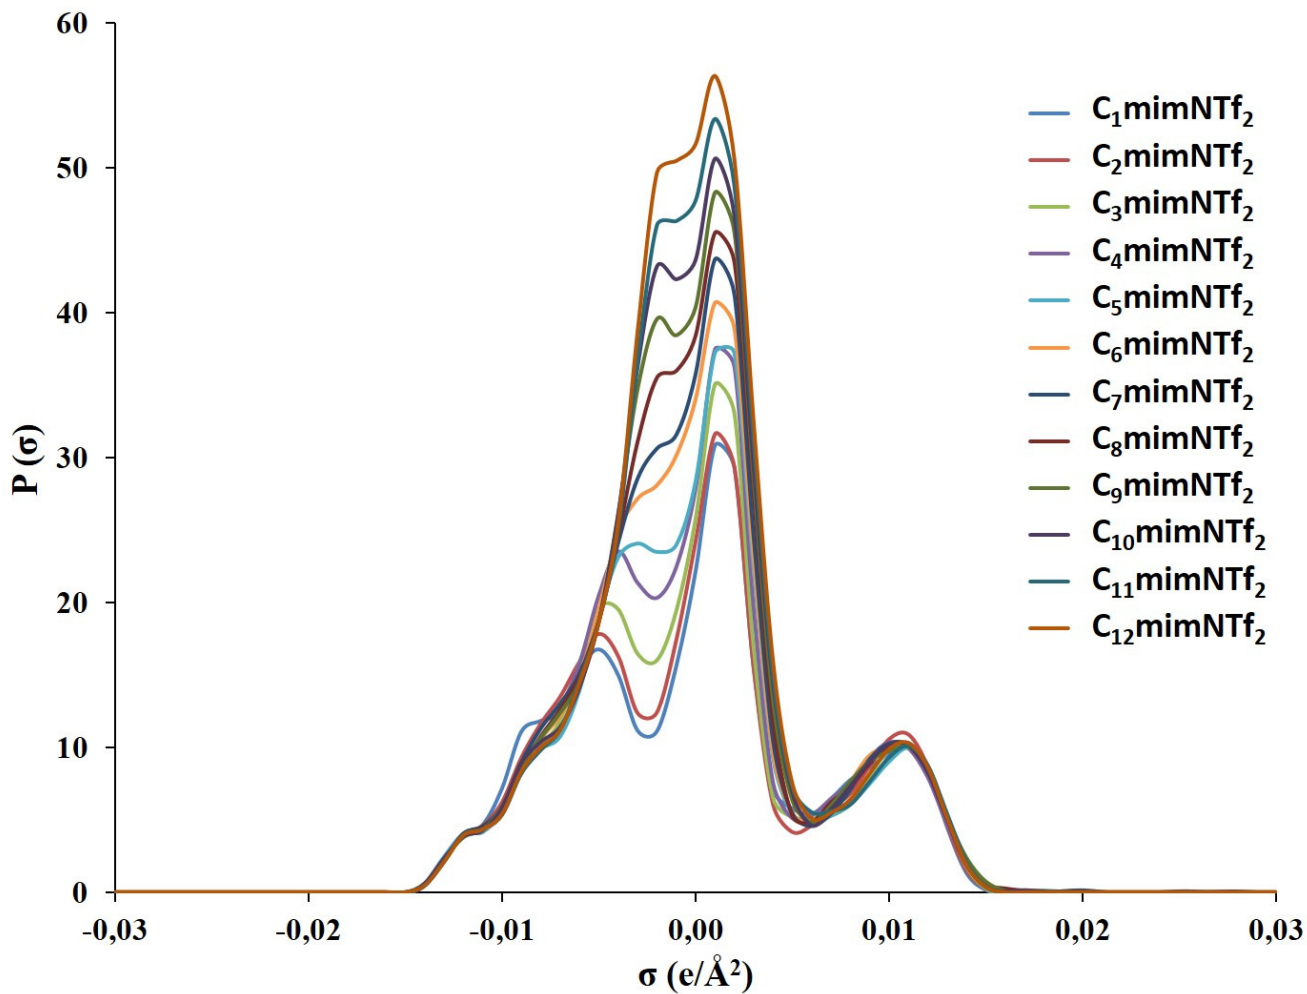

**Figure S 4**  $\sigma$ -profiles of  $C_{1-12}\text{mimNTf}_2$  represented as CA model with  $\varepsilon = 78$

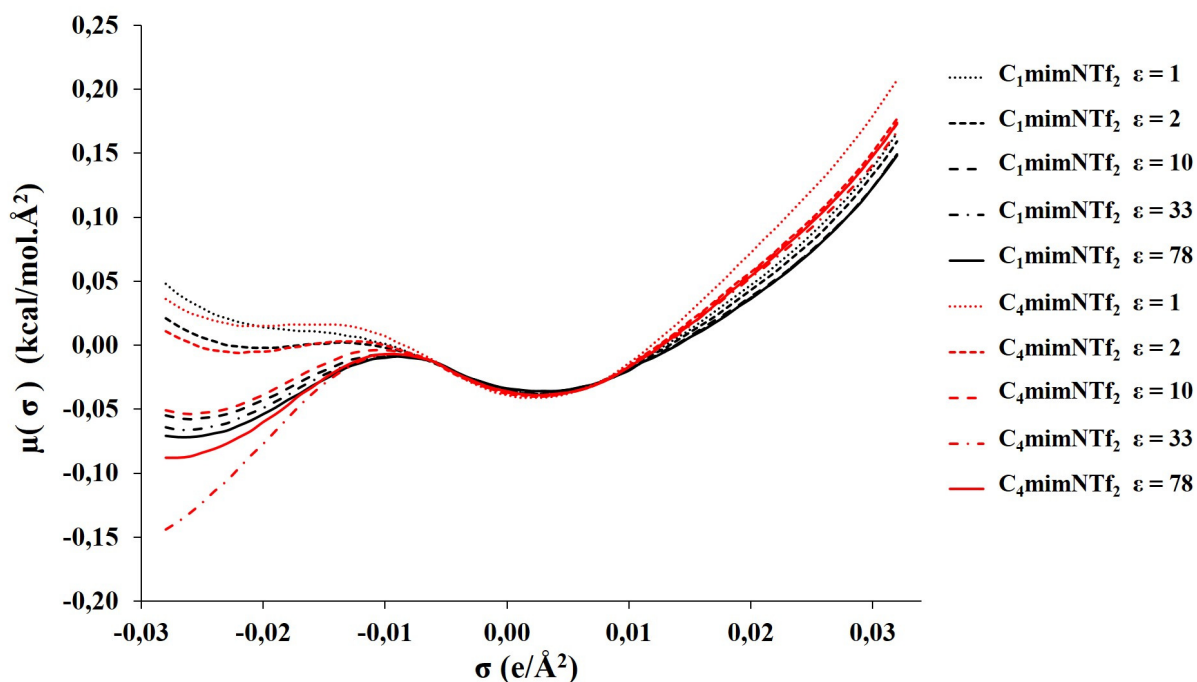

**Figure S 5**  $\sigma$ -potentials of  $C_1\text{mimNTf}_2$  (black lines) and  $C_4\text{mimNTf}_2$  (red lines) represented as CA model with different values of  $\epsilon$

**Table S 3** Vaporization enthalpy ( $\text{kJ}\cdot\text{mol}^{-1}$ ) of  $C_{1-12}\text{mimNTf}_2$  for  $\epsilon = 1$  and  $\epsilon = 78$  with both models, including experimental data

| Ionic liquid            | $\Delta H_{vap}$ CA model |                 | $\Delta H_{vap}$ C+A model |                 | $\Delta H_{vap}^{(a)}\text{Exp}$ |
|-------------------------|---------------------------|-----------------|----------------------------|-----------------|----------------------------------|
|                         | $\epsilon = 1$            | $\epsilon = 78$ | $\epsilon = 1$             | $\epsilon = 78$ |                                  |
| $C_1\text{mimNTf}_2$    | 108.4                     | 123.8           | 168.8                      | 173.2           | -                                |
| $C_2\text{mimNTf}_2$    | 107.2                     | 122.9           | 167.1                      | 171.6           | 133.2                            |
| $C_3\text{mimNTf}_2$    | 111.3                     | 125.9           | 167.4                      | 172.0           | 133.8                            |
| $C_4\text{mimNTf}_2$    | 116.0                     | 131.8           | 168.5                      | 173.1           | 139.2                            |
| $C_5\text{mimNTf}_2$    | 118.4                     | 131.8           | 169.9                      | 174.3           | 145.4                            |
| $C_6\text{mimNTf}_2$    | 122.9                     | 139.2           | 171.3                      | 175.8           | 150.1                            |
| $C_7\text{mimNTf}_2$    | 125.5                     | 144.2           | 172.9                      | 177.4           | 153.7                            |
| $C_8\text{mimNTf}_2$    | 130.4                     | 145.2           | 174.6                      | 179.1           | 155.2                            |
| $C_9\text{mimNTf}_2$    | 134.3                     | 150.2           | 176.3                      | 180.8           | -                                |
| $C_{10}\text{mimNTf}_2$ | 138.2                     | 153.3           | 178.1                      | 182.6           | 165.2                            |
| $C_{11}\text{mimNTf}_2$ | 140.9                     | 154.4           | 179.8                      | 180.2           | -                                |
| $C_{12}\text{mimNTf}_2$ | 144.9                     | 158.5           | 185.8                      | 186.1           | 171.5                            |

<sup>a)</sup> M. A. A. Rocha, C. F. R. A. C. Lima, L. R. Gomes, B. Schröder, J. A. P. Coutinho, I. M. Marrucho, J. M. S. S. Esperança, L. P. N. Rebelo, K. Shimizu, J. N. Canongia Lopes and L. M. N. B. F. Santos, *J. Phys. Chem B*, 2011, **115**, 10919–10926.

**Table S 4** Density (g.mL<sup>-1</sup>) of C<sub>1-12</sub>mimNTf<sub>2</sub> for  $\epsilon = 1$  and  $\epsilon = 78$  with both models, including experimental data

| Ionic liquid                        | $\rho$ CA model |                 | $\rho$ C+A model |                 | $\rho_{Exp}$        |
|-------------------------------------|-----------------|-----------------|------------------|-----------------|---------------------|
|                                     | $\epsilon = 1$  | $\epsilon = 78$ | $\epsilon = 1$   | $\epsilon = 78$ |                     |
| C <sub>1</sub> mimNTf <sub>2</sub>  | 1.539           | 1.520           | 1.565            | 1.572           | 1.570 <sup>a)</sup> |
| C <sub>2</sub> mimNTf <sub>2</sub>  | 1.495           | 1.472           | 1.517            | 1.519           | 1.515 <sup>a)</sup> |
| C <sub>3</sub> mimNTf <sub>2</sub>  | 1.460           | 1.437           | 1.473            | 1.476           | 1.476 <sup>b)</sup> |
| C <sub>4</sub> mimNTf <sub>2</sub>  | 1.419           | 1.399           | 1.438            | 1.439           | 1.436 <sup>a)</sup> |
| C <sub>5</sub> mimNTf <sub>2</sub>  | 1.391           | 1.370           | 1.406            | 1.407           | 1.404 <sup>b)</sup> |
| C <sub>6</sub> mimNTf <sub>2</sub>  | 1.360           | 1.340           | 1.375            | 1.376           | 1.371 <sup>a)</sup> |
| C <sub>7</sub> mimNTf <sub>2</sub>  | 1.336           | 1.315           | 1.351            | 1.351           | -                   |
| C <sub>8</sub> mimNTf <sub>2</sub>  | 1.311           | 1.297           | 1.326            | 1.327           | 1.319 <sup>a)</sup> |
| C <sub>9</sub> mimNTf <sub>2</sub>  | 1.288           | 1.277           | 1.300            | 1.304           | -                   |
| C <sub>10</sub> mimNTf <sub>2</sub> | 1.270           | 1.260           | 1.285            | 1.285           | 1.278 <sup>a)</sup> |
| C <sub>11</sub> mimNTf <sub>2</sub> | 1.250           | 1.236           | 1.268            | 1.267           | -                   |
| C <sub>12</sub> mimNTf <sub>2</sub> | 1.231           | 1.220           | 1.249            | 1.250           | 1.245 <sup>a)</sup> |

<sup>a)</sup> M. Tariq, P. A. S. Forte, M. F. Costa Gomes, J. N. Canongia Lopes and L. P. N.

Rebello, *J. Chem. Thermodyn.*, 2009, **41**, 790–798.

<sup>b)</sup> J. M. S. S. Esperança, Z. P. Visak, N. V. Plechkova, K. R. Seddon, H. J. R. Guedes and L. P. N. Rebello, *J. Chem. Eng. Data*, 2006, **51**, 2009–2015.

**Table S 5** Viscosity (cP) of C<sub>1-12</sub>mimNTf<sub>2</sub> for  $\epsilon = 1$  and  $\epsilon = 78$  with both models, including experimental data

| Ionic liquid                        | $\eta$ CA model |                 | $\eta$ C+A model |                 | $\eta_{Exp}^a)$ |
|-------------------------------------|-----------------|-----------------|------------------|-----------------|-----------------|
|                                     | $\epsilon = 1$  | $\epsilon = 78$ | $\epsilon = 1$   | $\epsilon = 78$ |                 |
| C <sub>1</sub> mimNTf <sub>2</sub>  | 28.81           | 66.22           | 33.96            | 42.29           | 33.00           |
| C <sub>2</sub> mimNTf <sub>2</sub>  | 26.33           | 64.87           | 38.87            | 49.79           | 45.75           |
| C <sub>3</sub> mimNTf <sub>2</sub>  | 29.76           | 75.86           | 47.73            | 61.26           | 50.62           |
| C <sub>4</sub> mimNTf <sub>2</sub>  | 43.58           | 120.30          | 59.07            | 76.49           | 57.81           |
| C <sub>5</sub> mimNTf <sub>2</sub>  | 50.77           | 117.19          | 72.70            | 93.82           | 70.61           |
| C <sub>6</sub> mimNTf <sub>2</sub>  | 72.46           | 208.59          | 88.33            | 114.41          | 81.11           |
| C <sub>7</sub> mimNTf <sub>2</sub>  | 82.61           | 313.29          | 105.48           | 136.98          | 93.05           |
| C <sub>8</sub> mimNTf <sub>2</sub>  | 121.35          | 326.30          | 125.63           | 162.54          | 106.41          |
| C <sub>9</sub> mimNTf <sub>2</sub>  | 157.80          | 464.09          | 147.39           | 192.12          | 120.18          |
| C <sub>10</sub> mimNTf <sub>2</sub> | 207.49          | 589.22          | 172.89           | 222.85          | -               |
| C <sub>11</sub> mimNTf <sub>2</sub> | 236.29          | 588.21          | 199.42           | 203.99          | 154.33          |
| C <sub>12</sub> mimNTf <sub>2</sub> | 310.15          | 783.61          | 229.97           | 297.61          | -               |

<sup>a)</sup> M. Tariq, P. J. Carvalho, J. A. P. Coutinho, I. M. Marrucho, J. N. Canongia Lopes and L. P. N. Rebello, *Fluid Phase Equilibr.*, 2011, **301**, 22–32.
